# Supplementary material
Source: publisher figshare collection journal article supplement (https://acs.figshare.com/ndownloader/files/21822750)
Supplement: Supplementary file 1 [file 21822750]

# **Fast and isothermal hydrothermal liquefaction of polysaccharide feedstocks**

Akhila Gollakota<sup>1</sup> and Phillip E. Savage<sup>1\*</sup>

<sup>1</sup>Department of Chemical Engineering, 121D Chemical and Biomedical Engineering Building,  
The Pennsylvania State University, University Park, PA 16802, United States

\* Corresponding author  
E-mail: psavage@psu.edu

5 Pages

1 Table

**Table S1** Tentative identities of organic compounds in biocrudes produced by isothermal HTL at 350 °C set-point temperature, 31.6 min and fast HTL at 500 °C set-point temperature, 1 min for the polysaccharide feedstocks

| Compound Group | Compound Identified                             | Starch |      | Cellulose |      | Amylopectin |      | Amylose |      | Pectin |      | Chitin |      |
|----------------|-------------------------------------------------|--------|------|-----------|------|-------------|------|---------|------|--------|------|--------|------|
|                |                                                 | Iso.   | Fast | Iso.      | Fast | Iso.        | Fast | Iso.    | Fast | Iso.   | Fast | Iso.   | Fast |
| Ketones        | 2-Cyclopenten-1-one,3-methyl-                   | ✓      |      | ✓         |      | ✓           |      | ✓       |      | ✓      |      | c      |      |
|                | 2-Cyclopenten-1-one,2,3-dimethyl-               | ✓      |      | ✓         |      | ✓           |      | ✓       |      | ✓      | ✓    | ✓      |      |
|                | 2-Cyclopenten-1-one                             | ✓      |      | ✓         |      | ✓           | ✓    | ✓       |      | ✓      |      |        |      |
|                | Ethanone,1-(3-hydroxyphenyl)-                   | ✓      | ✓    | ✓         |      | ✓           |      |         | ✓    |        | ✓    |        |      |
|                | 3,6-Heptanedione                                |        |      | ✓         |      | ✓           | ✓    | ✓       |      |        |      |        |      |
|                | 2-Cyclohexen-1-one, 6-methyl-3-(1-methylethyl)- | ✓      |      | ✓         |      | ✓           |      |         |      |        |      | ✓      |      |
|                | 2,5-Hexanedione                                 | ✓      |      | ✓         |      | ✓           | ✓    | ✓       |      |        |      |        |      |
|                | 2-Cyclopenten-1-one,2-methyl-                   | ✓      |      | ✓         |      | ✓           |      | ✓       |      | ✓      |      | ✓      |      |
|                | 1,2-Cyclopentanedione,3-methyl-                 | ✓      |      | ✓         |      |             |      | ✓       |      |        |      |        |      |
|                | 2-Cyclopenten-1-one,3-ethyl-                    | ✓      |      | ✓         |      | ✓           |      | ✓       |      | ✓      |      | ✓      |      |
|                | Ethanone,1-(1-cyclohexen-1-yl)-                 | ✓      |      | ✓         |      |             |      | ✓       |      | ✓      |      | ✓      |      |
|                | Cyclohexanone,3-ethenyl-                        | ✓      |      | ✓         |      | ✓           |      | ✓       |      | ✓      |      | ✓      |      |
|                | 2-Cyclopenten-1-one,3,4-dimethyl-               | ✓      |      | ✓         |      | ✓           |      | ✓       |      | ✓      |      | ✓      |      |
|                | 4,4-Dimethyl-2-cyclopenten-1-one                | ✓      |      | ✓         |      |             |      | ✓       |      | ✓      |      | ✓      |      |
|                | 2-Acetoncyclopentanone                          | ✓      |      | ✓         |      |             |      |         |      |        |      |        |      |
|                | 1,3-Cyclopentanedione, 2,4-dimethyl-            | ✓      |      |           |      |             |      |         |      |        |      |        |      |
|                | Cyclohept-4-enone                               | ✓      |      |           |      |             |      |         |      |        |      |        |      |
|                | 2-Cyclopenten-1-one, 3-ethyl-2-hydroxy-         | ✓      | ✓    |           |      | ✓           |      |         |      |        |      |        |      |
|                | 3-Methylcyclopentane-1,2-dione                  |        |      |           |      | ✓           |      |         |      |        |      |        |      |
|                | 3,4-dihydroxyphenyl-2-propanone                 |        |      |           |      | ✓           |      |         |      |        |      |        |      |
|                | 2-Cyclohexen-1-one, 3,4-dimethyl-               |        |      |           |      |             |      | ✓       |      | ✓      |      |        |      |
|                | 5-Hexen-2-one, 5-methyl-3-methylene-            |        |      |           |      |             |      | ✓       |      |        |      |        |      |
|                | Cyclopentanone                                  |        |      |           |      |             |      |         |      | ✓      |      | ✓      |      |
|                | 3-Methyl-3-cyclohexen-1-one                     |        |      |           |      |             |      |         |      | ✓      |      |        |      |
|                | 2-Cyclohexen-1-one,3-methyl-                    |        |      |           |      |             |      |         |      | ✓      |      |        |      |
|                | Cyclohexanone                                   |        |      |           |      |             |      |         |      | ✓      |      |        |      |
|                | 2-Cyclopenten-1-one, 2,3,4,5-tetramethyl-       |        |      |           |      |             |      |         |      |        |      | ✓      |      |
|                | 3-Methylcyclopentane-1,2-dione                  |        | ✓    |           |      |             |      |         | ✓    |        | ✓    |        |      |
|                | Maltol                                          |        | ✓    |           |      |             |      |         | ✓    |        |      |        |      |
|                | Ethanone,1-(2,5-dihydroxyphenyl)-               |        | ✓    |           |      |             |      |         |      |        | ✓    |        |      |
|                | 1,2-Cyclopentanedione                           |        | ✓    |           |      |             | ✓    |         | ✓    |        |      |        | ✓    |
|                | 2-Cyclohexen-1-one,4-(1-methylethyl)-           |        |      |           |      |             | ✓    |         | ✓    |        |      |        |      |
|                | 5,9-Dodecadien-2-one,6,10-dimethyl-,(E,E)-      |        |      |           |      |             |      |         | ✓    |        |      |        |      |
|                | 3-Buten-2-one, 4-(4-hydroxy-3-methoxyphenyl)-   |        |      |           |      |             |      |         |      |        | ✓    |        |      |
|                | 2-Hydroxy-3-propyl-2-cyclopenten-1-one          |        |      |           |      |             |      |         |      |        | ✓    |        |      |

| Compound Group       | Compound Identified                                      | Starch |      | Cellulose |      | Amylopectin |      | Amylose |      | Pectin |      | Chitin |      |
|----------------------|----------------------------------------------------------|--------|------|-----------|------|-------------|------|---------|------|--------|------|--------|------|
|                      |                                                          | Iso.   | Fast | Iso.      | Fast | Iso.        | Fast | Iso.    | Fast | Iso.   | Fast | Iso.   | Fast |
| Phenols              | Phenol                                                   | ✓      |      | ✓         | ✓    | ✓           | ✓    | ✓       | ✓    | ✓      |      | ✓      | ✓    |
|                      | Phenol,2-methyl-                                         | ✓      |      | ✓         |      | ✓           |      | ✓       |      | ✓      |      | ✓      |      |
|                      | Phenol,3-methyl-                                         | ✓      |      | ✓         |      | ✓           |      | ✓       |      | ✓      | ✓    | ✓      |      |
|                      | Phenol,2,3-dimethyl-                                     |        |      | ✓         |      |             |      |         |      |        |      |        |      |
|                      | Phenol,2,5-dimethyl-                                     |        |      |           |      |             |      |         |      | ✓      |      |        |      |
|                      | Phenol,4-ethyl-2-methoxy-                                |        |      |           |      |             |      |         |      | ✓      |      |        |      |
|                      | Phenol,3,4-dimethyl-                                     |        |      | ✓         |      |             |      | ✓       |      |        |      |        |      |
|                      | Phenol,2,2'-methylenebis[6-(1,1-dimethylethyl)-4-methyl- |        | ✓    | ✓         | ✓    | ✓           |      |         |      |        | ✓    |        |      |
|                      | Phenol, 2-methoxy-                                       |        |      |           |      |             |      |         |      |        |      | ✓      |      |
|                      | 2-Methoxy-5-methylphenol                                 |        |      |           | ✓    |             |      |         |      |        |      |        |      |
| Indanone derivatives | 1H-Inden-1-one,2,3-dihydro-                              | ✓      |      | ✓         |      | ✓           |      | ✓       |      | ✓      |      | ✓      |      |
|                      | 7-Methylindan-1-one                                      | ✓      |      | ✓         |      | ✓           |      | ✓       |      | ✓      |      |        |      |
|                      | Indan-1,2-dione, 4,7-dimethyl-                           |        |      |           |      | ✓           |      |         |      |        |      |        |      |
|                      | 1H-Inden-5-ol, 2,3-dihydro-                              |        |      | ✓         |      | ✓           |      | ✓       |      | ✓      |      |        |      |
|                      | 4-Hydroxy-1-indanone                                     |        |      |           |      |             |      | ✓       |      | ✓      |      |        |      |
|                      | 1-Methylindan-2-one                                      |        |      |           |      |             |      |         |      | ✓      |      |        |      |
| Furan derivatives    | 2-Methyl-5-hydroxybenzofuran                             | ✓      | ✓    | ✓         |      | ✓           |      | ✓       |      |        | ✓    |        |      |
|                      | 2,4-Dimethylfuran                                        | ✓      | ✓    | ✓         |      | ✓           |      | ✓       |      |        |      |        |      |
|                      | 2(3H)-Benzofuranone                                      |        |      |           |      | ✓           |      |         |      |        |      |        |      |
|                      | Benzofuran,4,7-dimethyl-                                 |        |      |           |      |             |      | ✓       |      |        |      |        |      |
|                      | Benzofuran,2-methyl-                                     |        |      |           |      |             |      | ✓       |      | ✓      |      |        |      |
|                      | 2-Furancarboxaldehyde, 5-methyl-                         | ✓      |      |           | ✓    | ✓           | ✓    | ✓       | ✓    |        |      |        | ✓    |
|                      | 5-Hydroxymethylfurfural                                  |        | ✓    | ✓         | ✓    |             | ✓    |         | ✓    |        | ✓    |        | ✓    |
|                      | Benzofuran-2,3-dione,4,7-dimethyl-2,3-dihydro-           | ✓      |      |           |      |             |      |         |      |        |      |        |      |
|                      | 2-Furancarboxylic acid,2-methylpropyl ester              |        | ✓    |           |      |             |      |         |      |        |      |        |      |
|                      | 2-Methyl-5-hydroxybenzofuran                             |        |      |           |      |             |      |         |      |        |      |        |      |
|                      | 2,5-Furandicarboxaldehyde                                |        | ✓    |           | ✓    |             | ✓    |         | ✓    |        |      |        | ✓    |
|                      | Furyl hydroxymethyl ketone                               |        |      |           | ✓    |             | ✓    |         | ✓    |        |      |        |      |
|                      | Furfural                                                 |        |      |           |      |             | ✓    |         |      |        |      |        |      |
|                      | 2-Acetyl-5-methylfuran                                   |        |      |           |      |             | ✓    |         |      |        |      |        |      |
|                      | 2(5H)-Furanone                                           |        |      |           |      |             | ✓    |         |      |        |      |        |      |
|                      | 2,2'-Bifuran                                             |        |      |           | ✓    |             |      |         |      |        |      |        |      |
|                      | 2(5H)-Furanone, 5,5-dimethyl-                            |        |      |           |      |             |      |         |      |        |      |        | ✓    |
|                      | 5-Acetoxyethyl-2-furaldehyde                             |        |      |           |      |             |      |         | ✓    |        |      |        | ✓    |

| Compound Group      | Compound Identified                                       | Starch |      | Cellulose |      | Amylopectin |      | Amylose |      | Pectin |      | Chitin |      |
|---------------------|-----------------------------------------------------------|--------|------|-----------|------|-------------|------|---------|------|--------|------|--------|------|
|                     |                                                           | Iso.   | Fast | Iso.      | Fast | Iso.        | Fast | Iso.    | Fast | Iso.   | Fast | Iso.   | Fast |
| Benzene derivatives | Catechol                                                  |        | ✓    |           |      | ✓           |      |         |      | ✓      | ✓    |        |      |
|                     | 1,2-Benzenediol,4-methyl-                                 | ✓      | ✓    | ✓         |      | ✓           |      |         |      | ✓      | ✓    |        |      |
|                     | 1,2-Benzenediol,3-methyl-                                 | ✓      | ✓    | ✓         |      | ✓           |      |         |      |        | ✓    |        |      |
|                     | 2-Coumaranone                                             |        |      | ✓         |      |             |      |         |      |        |      |        |      |
|                     | 1,3-Benzenediol,4-ethyl-                                  |        | ✓    | ✓         |      |             |      |         |      | ✓      |      |        |      |
|                     | 1,4-Benzenediol,2-methyl-                                 |        |      |           |      |             |      |         | ✓    |        |      |        |      |
|                     | 1,4-Benzenedicarboxaldehyde,2-methyl-                     | ✓      |      |           |      |             |      |         |      | ✓      |      |        |      |
|                     | Benzene,ethoxy-                                           |        |      |           |      |             |      |         |      |        |      | ✓      |      |
|                     | Resorcinol,2-acetyl-                                      |        | ✓    |           |      |             |      |         |      |        |      |        |      |
|                     | Benzaldehyde, 3-hydroxy-                                  |        | ✓    |           |      |             |      |         |      |        |      |        |      |
|                     | Benzene,1,3-bis(1,1-dimethylethyl)-                       |        |      |           | ✓    |             |      |         |      |        |      |        |      |
|                     | Benzaldehyde, 3-hydroxy-3-Formylphenol                    |        |      |           |      |             |      |         |      |        | ✓    |        |      |
|                     | Resorcinol,2-acetyl-                                      |        |      |           |      |             |      |         |      |        | ✓    |        |      |
|                     | Hydrocoumarin                                             |        |      |           |      |             |      |         |      |        | ✓    |        |      |
|                     | 4-Hydroxy-2-methylbenzaldehyde                            |        |      |           |      |             |      |         |      |        | ✓    |        |      |
|                     | 3-Hydroxy-2-methylbenzaldehyde                            |        |      |           |      |             |      |         |      |        | ✓    |        |      |
|                     | Vanillin                                                  |        |      |           |      |             |      |         |      |        | ✓    |        |      |
|                     | 4-Ethoxystyrene                                           |        |      |           |      |             |      |         |      |        | ✓    |        |      |
| Acids               | 2-Hexenoic acid,3,4,4-trimethyl-5-oxo-,(Z)-               |        | ✓    |           |      |             |      |         |      |        |      |        |      |
|                     | n-Hexadecanoic acid                                       |        |      |           | ✓    |             | ✓    |         | ✓    |        |      |        |      |
| Alcohols            | 1-Dodecanol                                               |        |      |           | ✓    |             | ✓    |         | ✓    |        |      |        |      |
|                     | 1-Decanol,2-hexyl-                                        |        |      |           | ✓    |             |      |         | ✓    |        |      |        |      |
|                     | 1-Decanol, 2-octyl-                                       |        |      |           | ✓    |             |      |         |      |        |      |        |      |
|                     | n-Nonadecanol-1                                           |        |      |           | ✓    |             |      |         |      |        |      |        |      |
|                     | 2-Isopropyl-5-methyl-1-heptanol                           |        |      |           |      |             |      |         | ✓    |        |      |        |      |
| Esters              | 2-Propenoic acid, pentadecyl ester                        |        |      |           | ✓    |             | ✓    |         | ✓    |        |      |        |      |
|                     | Hexadecanoic acid,2-hydroxy-1-(hydroxymethyl) ethyl ester |        |      |           | ✓    |             | ✓    |         |      |        |      |        |      |
| Hydrocarbons        | Nonane,5-butyl-                                           |        |      |           |      |             | ✓    |         |      |        |      |        |      |
|                     | Eicosane                                                  |        |      |           | ✓    |             |      |         | ✓    |        |      |        |      |
|                     | Heptadecane                                               |        |      |           | ✓    |             |      |         | ✓    |        |      |        | ✓    |
|                     | Tetracosane                                               |        |      |           |      |             |      |         |      |        |      |        | ✓    |
|                     | Tetratriacontane                                          |        |      |           |      |             |      |         |      |        |      |        | ✓    |
|                     | Hexatriacontane                                           |        |      |           |      |             |      |         |      |        |      |        | ✓    |

| Compound Group        | Compound Identified                     | Starch |      | Cellulose |      | Amylopectin |      | Amylose |      | Pectin |      | Chitin |      |
|-----------------------|-----------------------------------------|--------|------|-----------|------|-------------|------|---------|------|--------|------|--------|------|
|                       |                                         | Iso.   | Fast | Iso.      | Fast | Iso.        | Fast | Iso.    | Fast | Iso.   | Fast | Iso.   | Fast |
| Nitrogenous compounds | 2,5-Pyrrolidinedione, 1-methyl          |        |      |           |      |             |      |         |      |        |      | ✓      |      |
|                       | 2-acetyl pyrrole                        |        |      |           |      |             |      |         |      |        |      | ✓      | ✓    |
|                       | Pyridine                                |        |      |           |      |             |      |         |      |        |      | ✓      |      |
|                       | 1H-Indole, 2,3-dimethyl-                |        |      |           |      |             |      |         |      |        |      | ✓      |      |
|                       | Pyridine, 4-propyl-                     |        |      |           |      |             |      |         |      |        |      | ✓      |      |
|                       | Pyrazine, methyl-                       |        |      |           |      |             |      |         |      |        |      | ✓      |      |
|                       | 2,6-Dimethylphenyl isocyanate           |        |      |           |      |             |      |         |      |        |      | ✓      |      |
|                       | Pyrazine, 2-ethyl-3-methyl-             |        |      |           |      |             |      |         |      |        |      | ✓      |      |
|                       | 2-Acetyl-1-methylpyrrole                |        |      |           |      |             |      |         |      |        |      | ✓      |      |
|                       | 2,5-Pyrrolidinedione, 1-ethyl           |        |      |           |      |             |      |         |      |        |      | ✓      |      |
|                       | Pyridine, 2-methyl-                     |        |      |           |      |             |      |         |      |        |      | ✓      |      |
|                       | 1,3-Benzoxazol-4-ol                     |        |      |           |      |             |      |         |      |        |      | ✓      |      |
|                       | Acetamide                               |        |      |           |      |             |      |         |      |        |      | ✓      |      |
|                       | 1H-Pyrrole-2-carboxaldehyde             |        |      |           |      |             |      |         |      |        |      |        | ✓    |
|                       | 1H-Pyrrole-2-carboxaldehyde, 1-methyl-  |        |      |           |      |             |      |         |      |        |      |        | ✓    |
|                       | 2-Acetoxymethylpyridine                 |        |      |           |      |             |      |         |      |        |      |        | ✓    |
|                       | 4(1H)-Pyridinone, 2,3-dihydro-1-methyl- |        |      |           |      |             |      |         |      |        |      |        | ✓    |
|                       | 3-(Furan-2-yl)-4-methyl-1,2,4-triazole  |        |      |           |      |             |      |         |      |        |      |        | ✓    |
|                       | Acetamide, N-(2,4-dihydroxyphenyl)-     |        |      |           |      |             |      |         |      |        |      |        | ✓    |
|                       | 4-Hydroxy-6-(methylamino)pyrimidine     |        |      |           |      |             |      |         |      |        |      |        | ✓    |
